# Supplementary material for: Total Synthesis of the Natural Chalcone Lophirone E, Synthetic Studies toward Benzofuran and Indole-Based Analogues, and Investigation of Anti-Leishmanial Activity
Source: MDPI journal article supplement (doi:10.3390/molecules27020463), 2022-01-11
Supplement: s1 [file s1]

## Supplementary Materials

# Total Synthesis of the Natural Chalcone Lophirone E and Synthetic Studies toward Benzofuran and Indole-based Analogues: Investigation of their anti-Leishmanial Activity

Luca Pozzetti,<sup>1</sup> Roberta Ibba,<sup>1</sup> Sara Rossi,<sup>1</sup> Orazio Taglialatela-Scafati,<sup>2</sup> Donatella Taramelli,<sup>3</sup> Nicoletta Basilico,<sup>4</sup> Sarah D'Alessandro<sup>3</sup>, Silvia Parapini<sup>5</sup>, Stefania Butini,<sup>1</sup> Giuseppe Campiani,<sup>1\*</sup> Sandra Gemma,<sup>1\*</sup>

<sup>1</sup> Department of Biotechnology, Chemistry and Pharmacy, University of Siena, Via Aldo Moro 2, 53100 Siena, Italy; luca.pozzetti@student.unisi.it (L.P.); roberta.ibba@unisi.it (R.I.); rossi115@student.unisi.it (R.S.); butini3@unisi.it (S.B.); campiani@unisi.it (G.C.); gemma@unisi.it (G.S.)

<sup>2</sup> Department of Pharmacy, School of Medicine and Surgery, University of Naples Federico II, Via D. Montesano 49, 80131 Naples, Italy; scatagli@unina.it (O.T.-S.)

<sup>3</sup> Department of Pharmacological and Molecular Sciences, University of Milan, Via Pascal 36, 20133 Milano, Italy donatella.taramelli@unimi.it, sarah.dalessandro@unimi.it (S.D.)

<sup>4</sup> Department of Biomedical, Surgical and Dental Sciences, University of Milan, Via Pascal 36, 20133 Milano, Italy nicoleta.basilico@unimi.it (N.B.)

<sup>5</sup> Department of Biomedical Sciences for Health, University of Milan, Via Mangiagalli 31, 20133 Milano silvia.parapini@unimi.it (S.P.)

\* Correspondence: gemma@unisi.it; campiani@unisi.it

## 1. Chemistry

### 1.1. Synthesis of reference chalcone 29

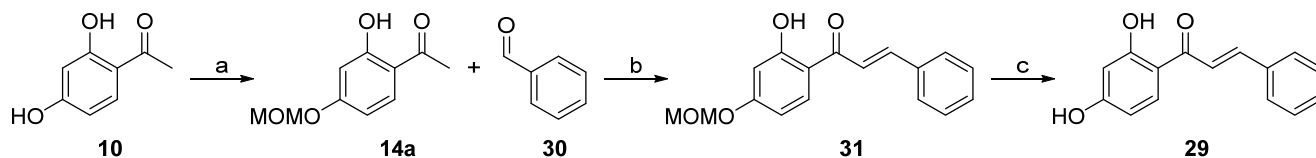

**Scheme S1.** Reagents and Conditions: **a)** MOMCl, DIPEA, dry DCM, 25 °C, 2 h; **b)** NaOH (5 M), EtOH, 0 °C to 25 °C, 72 h; **c)** HCl (12 M), MeOH/THF, 0 °C to 40 °C, 1 h.

#### 1.1.1. Experimental Procedures

**1-(2-Hydroxy-4-(methoxymethoxy)phenyl)ethan-1-one (14a).** To a solution of 1-(2,4-dihydroxyphenyl)ethan-1-one (**10**, 1 eq., 1 mmol) in anhydrous DCM (10 mL), DIPEA (1.5 eq., 1.5 mmol) was added, followed by chloromethyl methyl ether (1.5 eq., 1.5 mmol). The mixture was stirred at 25 °C for 2 h. Reaction mixture was washed with HCl (1 M) (2x5 mL) and then with NaHCO<sub>3</sub> (s.s., 5 mL), and brine (5 mL). The organic phase was dried over Na<sub>2</sub>SO<sub>4</sub> and evaporated under reduced pressure to obtain the title compound with no further purification (quantitative yield) as a yellow oil. <sup>1</sup>H NMR (300 MHz, CDCl<sub>3</sub>) δ 12.60 (s, 1H, C2'OH), 7.65 (d, *J* = 8.8 Hz, 1H, C6'-H), 6.59 (d, *J* = 2.4 Hz, 1H, C3'-H), 6.55 (dd, *J* = 8.8, 2.4 Hz, 1H, C5'-H), 5.20 (s, 2H, OCH<sub>2</sub>OCH<sub>3</sub>), 3.47 (s, 3H, OCH<sub>2</sub>OCH<sub>3</sub>), 2.56 (s, 3H, COCH<sub>3</sub>). ESI-MS, *m/z* [M-H]<sup>+</sup> 195.

**(E)-1-(2-hydroxy-4-(methoxymethoxy)phenyl)-3-phenylprop-2-en-1-one (31).** To a solution of 1-(2-Hydroxy-4-(methoxymethoxy)phenyl)ethan-1-one (**14a**) (1 eq., 1 mmol) in absolute EtOH (3 mL), cooled to 0 °C, NaOH<sub>aq.</sub> (5 M, 5 mmol) was added dropwise. The mixture was stirred at 0 °C for 30 minutes and then a solution of benzaldehyde (**30**) (1.2 eq., 1.2 mmol) in absolute EtOH (1.5 mL) was added dropwise. The ice bath was removed, and the mixture was stirred at 25 °C for 48 h. The reaction was acidified with HCl (1 M) and extracted with EtOAc (3x5 mL). The combined organic phases were washed with NaHCO<sub>3</sub> (s.s., 10 mL) and brine (5 mL), dried over Na<sub>2</sub>SO<sub>4</sub> and evaporated under reduced pressure. The residue was purified by silica gel column chromatography (Pet. Et./EtOAc 2:1) to afford the title compound as a yellow solid (85% yield). <sup>1</sup>H NMR (300 MHz, CDCl<sub>3</sub>) δ 13.27 (s, 1H, C2'OH), 7.89 (d, *J* = 15.7 Hz, 1H, CαH=CβH), 7.83 (d, *J* = 9.0 Hz, 1H, C6'-H), 7.69 – 7.62 (m, 2H, Ar-H), 7.58 (d, *J* = 15.5 Hz, 1H, CαH=CβH), 7.47 – 7.35 (m, 3H, Ar-H), 6.65 (d, *J* = 2.3 Hz, 1H, C3'-H), 6.60 (dd, *J* = 9.0, 2.2 Hz, 1H, C5'-H), 5.22 (s, 2H, OCH<sub>2</sub>OCH<sub>3</sub>), 3.49 (s, 3H, OCH<sub>2</sub>OCH<sub>3</sub>). ESI-MS, *m/z* [M-H]<sup>+</sup> 283.

**(E)-1-(2,4-dihydroxyphenyl)-3-phenylprop-2-en-1-one (29, CAS registry number 25515-43-9).** To a 0 °C cooled solution of (E)-1-(2-hydroxy-4-(methoxymethoxy)phenyl)-3-phenylprop-2-en-1-one (**31**) (1 eq., 1 mmol) in MeOH/THF (1:1, 20 mL in total), HCl (12 M, 20 eq., 20 mmol) was added dropwise. The ice bath was removed, and the reaction mixture was heated to 40 °C for 3 h. After cooling, NaHCO<sub>3</sub> (s.s.) was carefully added until pH=7 and the aqueous phase was extracted with EtOAc (3x10 mL). The combined organic phases were washed with brine (15 mL), dried over Na<sub>2</sub>SO<sub>4</sub> and evaporated under reduced pressure. The residue was purified by silica gel column chromatography (DCM/MeOH 100:1) to afford the title compound as a yellow solid (quantitative yield). <sup>1</sup>H NMR (300 MHz, CDCl<sub>3</sub>) δ 13.37 (s, 1H, C2'OH), 7.89 (d, *J* = 15.9 Hz, 1H, CαH=CβH), 7.83 (d, *J* = 8.9 Hz, 1H, C6'-H), 7.74 – 7.61 (m, 2H, Ar-H), 7.57 (d, *J* = 15.5 Hz, 1H, CαH=CβH), 7.51 – 7.35 (m, 3H, Ar-H), 6.45 (m, 2H). <sup>13</sup>C NMR (75 MHz, CDCl<sub>3</sub>) δ 191.99, 166.40, 162.70, 144.67, 134.70, 132.02, 130.72, 128.99 (2C), 128.54 (2C), 120.22, 114.49, 107.80, 103.81. ESI-MS, *m/z* [M-H]<sup>+</sup> 239.

### 1.2. Spectral data of final compounds

**Figure S1.**  $^1\text{H}$  NMR (300 MHz, Acetone- $d_6$ ) spectrum of lophirone E (**1**).

**Figure S2.**  $^{13}\text{C}$  NMR (75 MHz, Acetone- $d_6$ ) spectrum of lophirone E (1).  
1.2.2. **Compound 16**

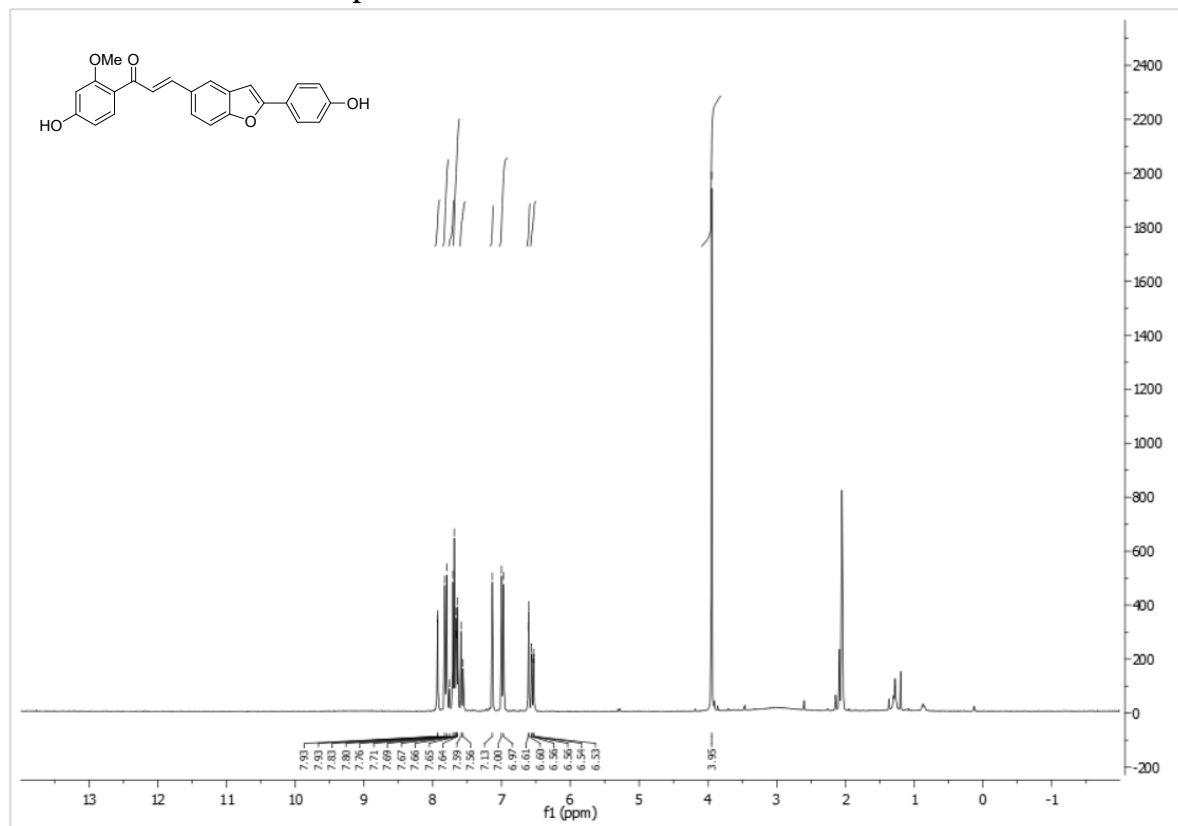

**Figure S3.**  $^1\text{H}$  NMR (300 MHz, Acetone- $d_6$ ) spectrum of compound 16.

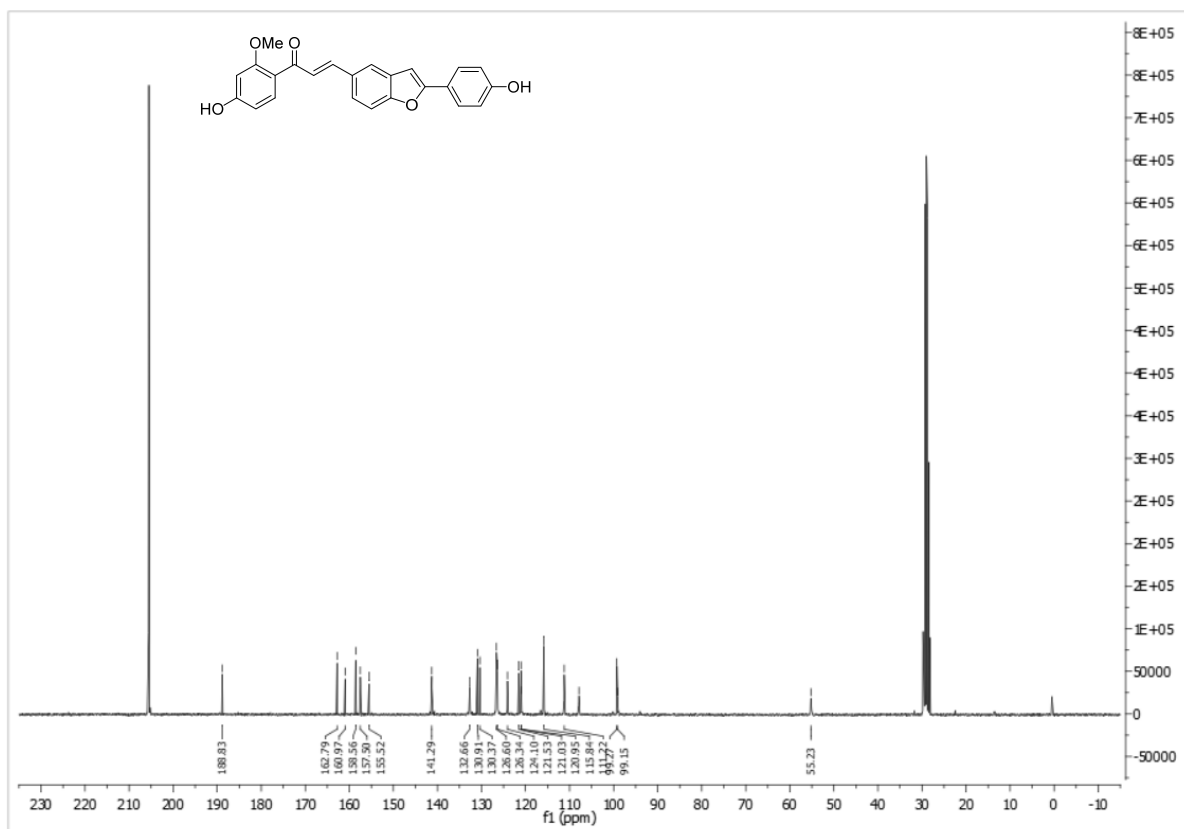

**Figure S4.**  $^{13}\text{C}$  NMR (75 MHz, Acetone- $d_6$ ) spectrum of compound 16.

## 1.2.3. Compound 17

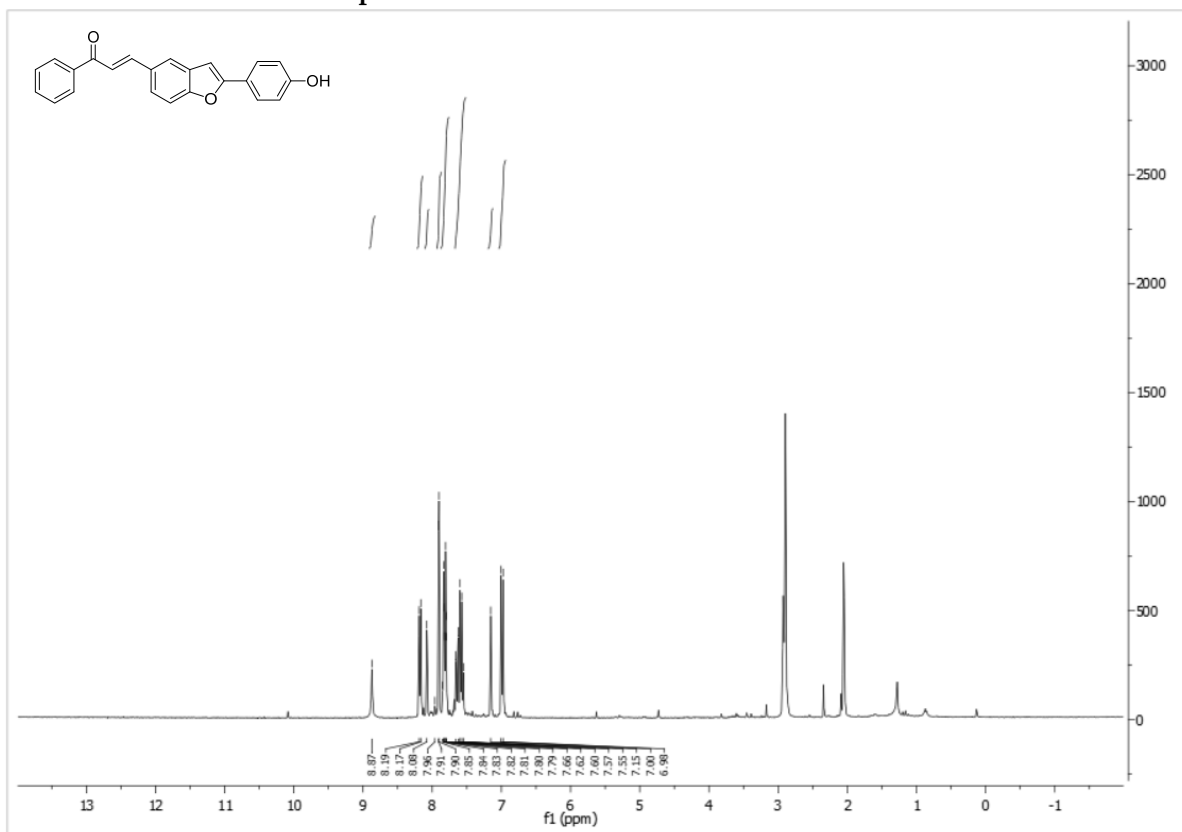Figure S5.  $^1\text{H}$  NMR (300 MHz, Acetone- $d_6$ ) spectrum of compound 17.

## 1.2.4. Compound 18

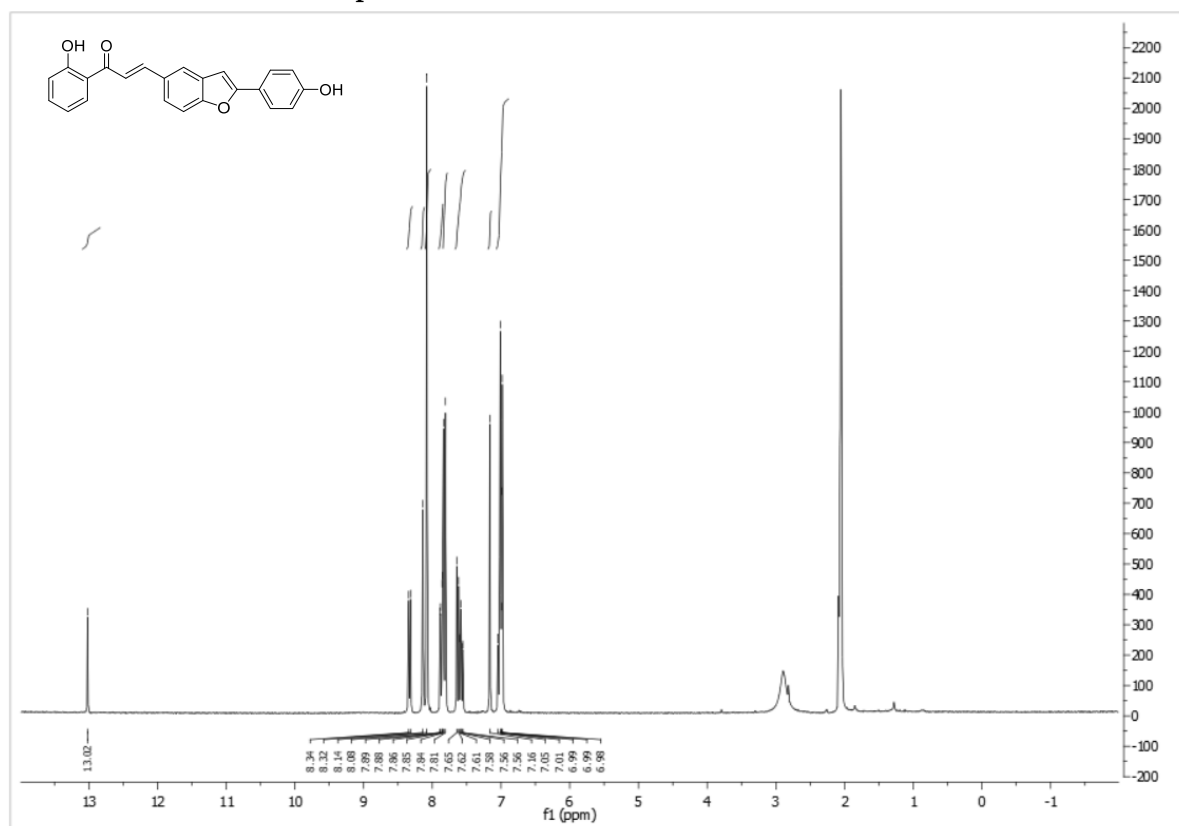

**Figure S6.**  $^1\text{H}$  NMR (300 MHz, Acetone- $d_6$ ) spectrum of compound 18.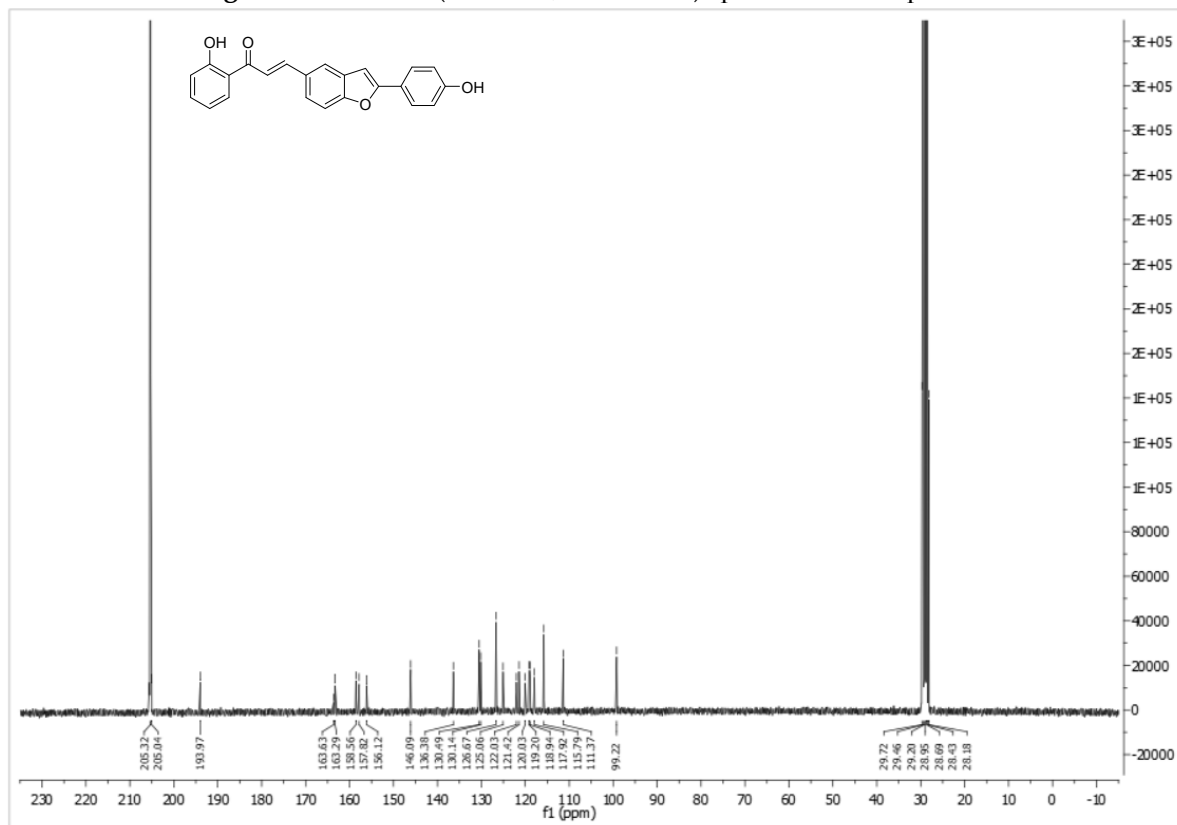**Figure S7.**  $^{13}\text{C}$  NMR (75 MHz, Acetone- $d_6$ ) spectrum of compound 18.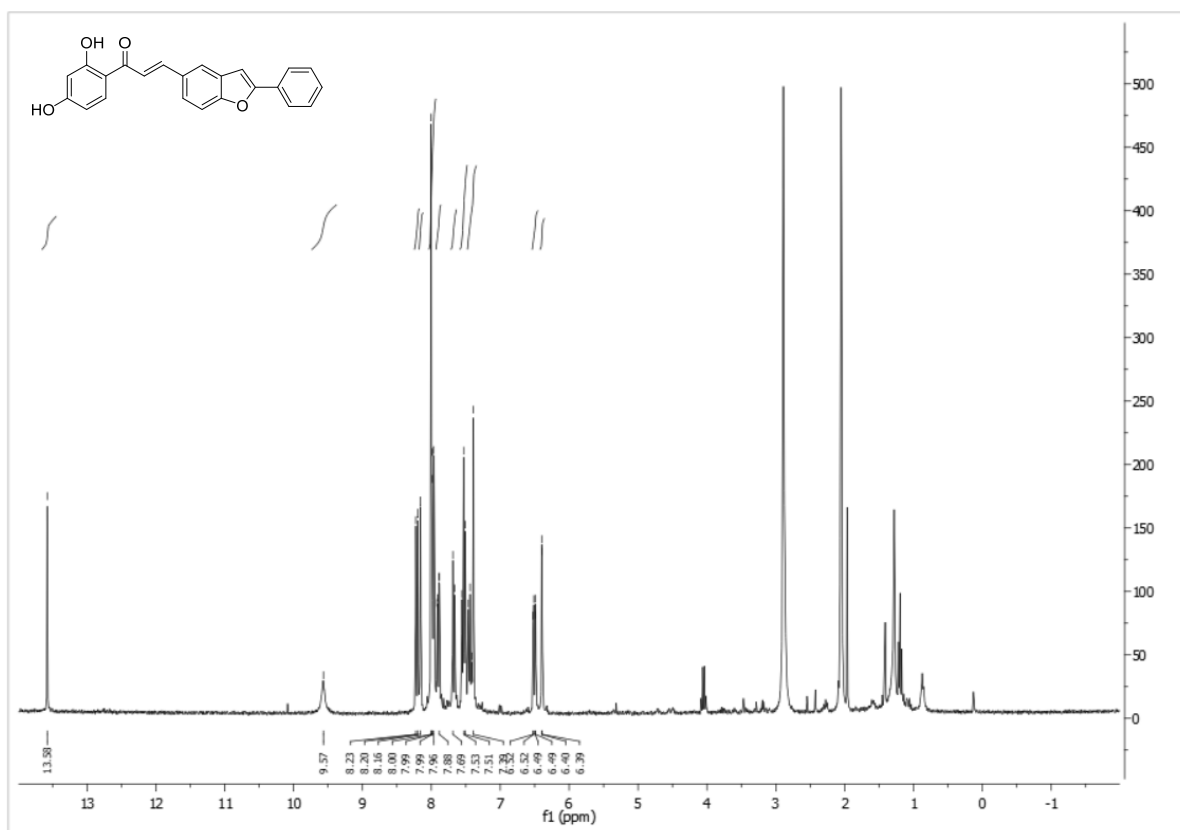**1.2.5. Compound 21a****Figure S8.**  $^1\text{H}$  NMR (300 MHz, Acetone- $d_6$ ) spectrum of compound 21a.

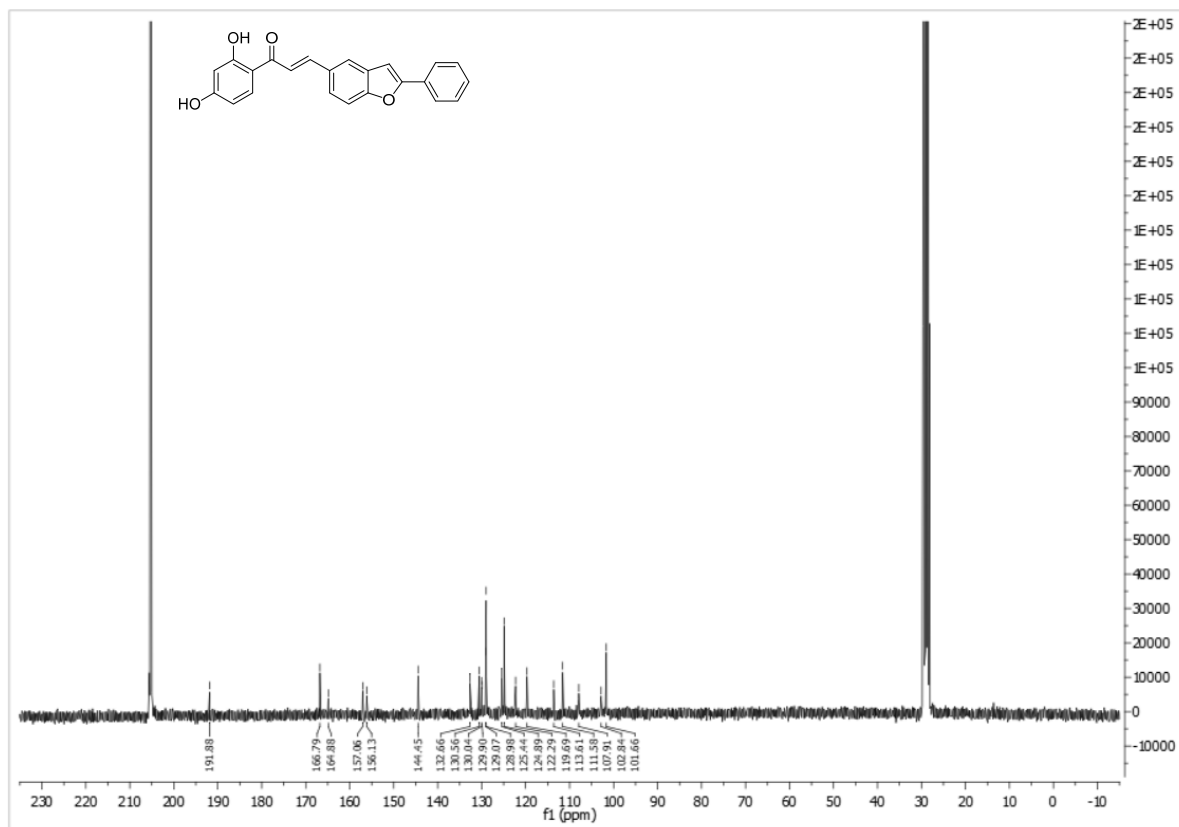

Figure S9. <sup>13</sup>C NMR (75 MHz, Acetone-*d*<sub>6</sub>) spectrum of compound 21a.

#### 1.2.6. Compound 21b

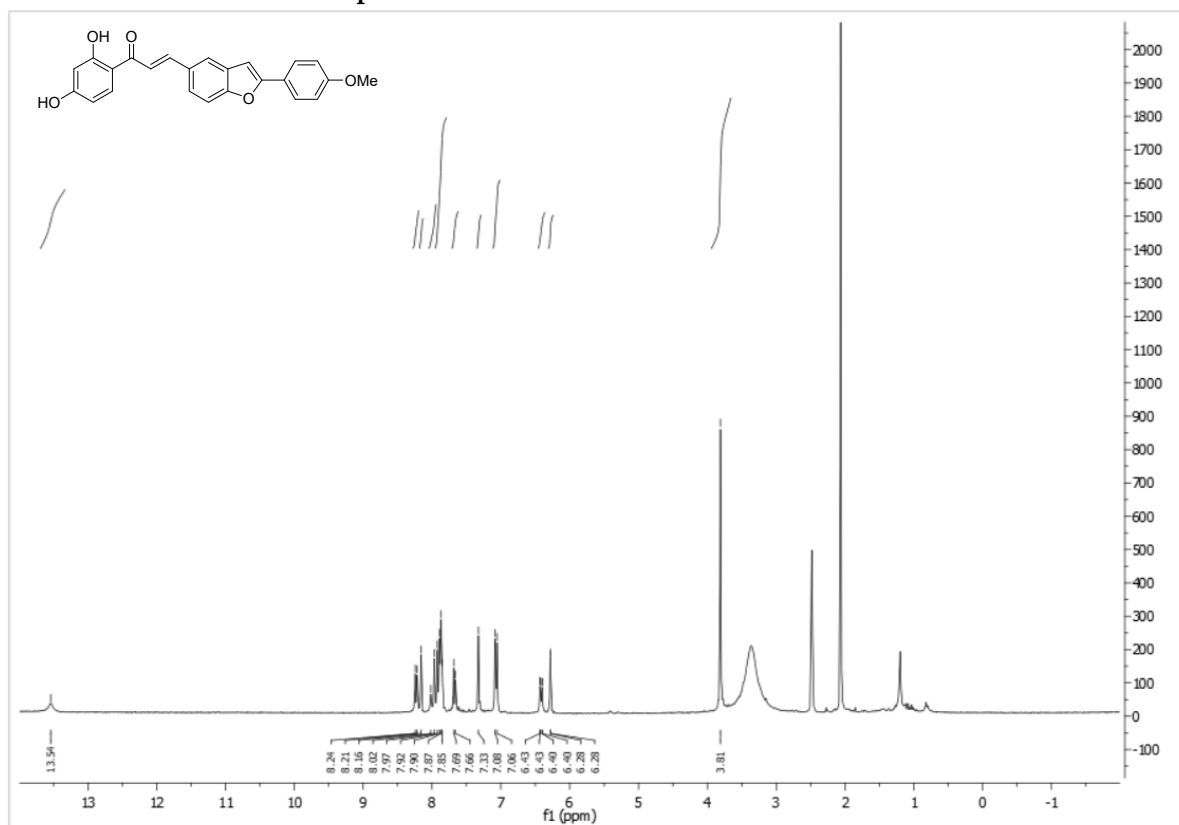

Figure S10. <sup>1</sup>H NMR (300 MHz, DMSO-*d*<sub>6</sub>) spectrum of compound 21b.

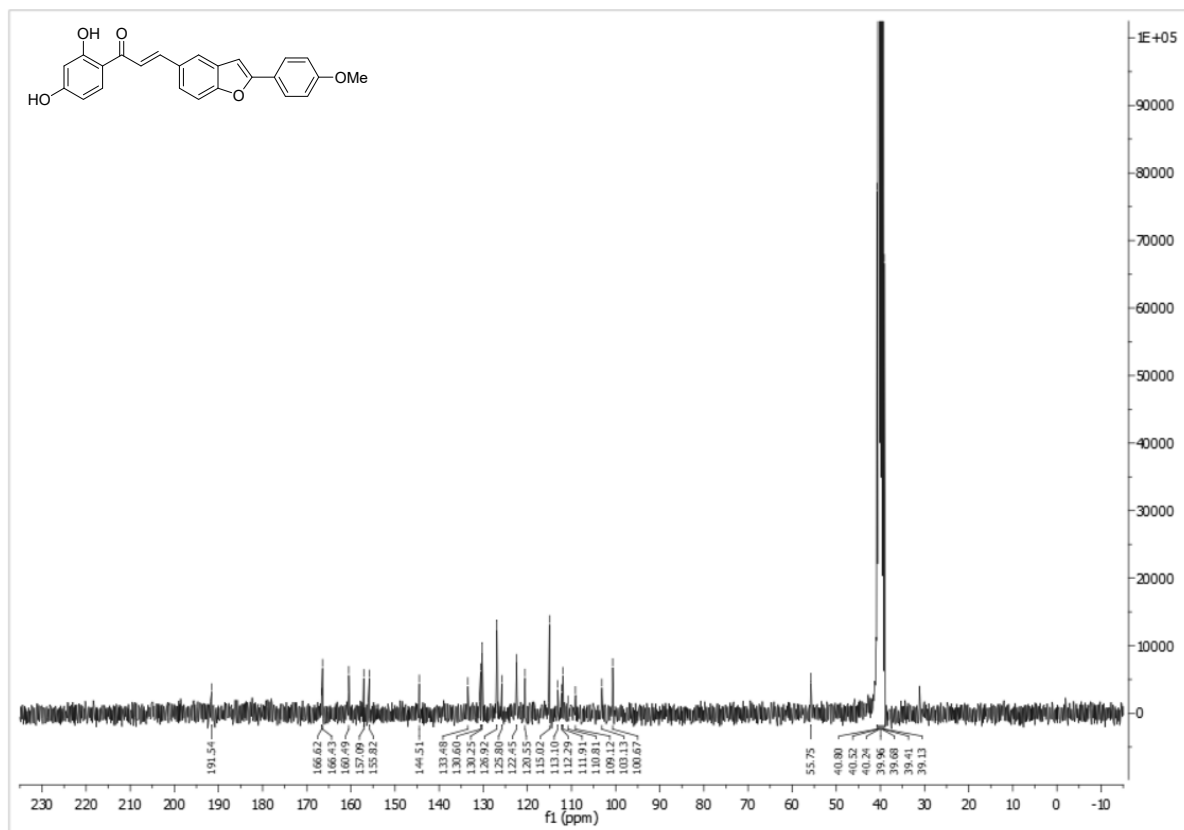

Figure S11.  $^{13}\text{C}$  NMR (75 MHz,  $\text{Acetone-}d_6$ ) spectrum of compound 21b.

#### 1.2.7. Compound 25a

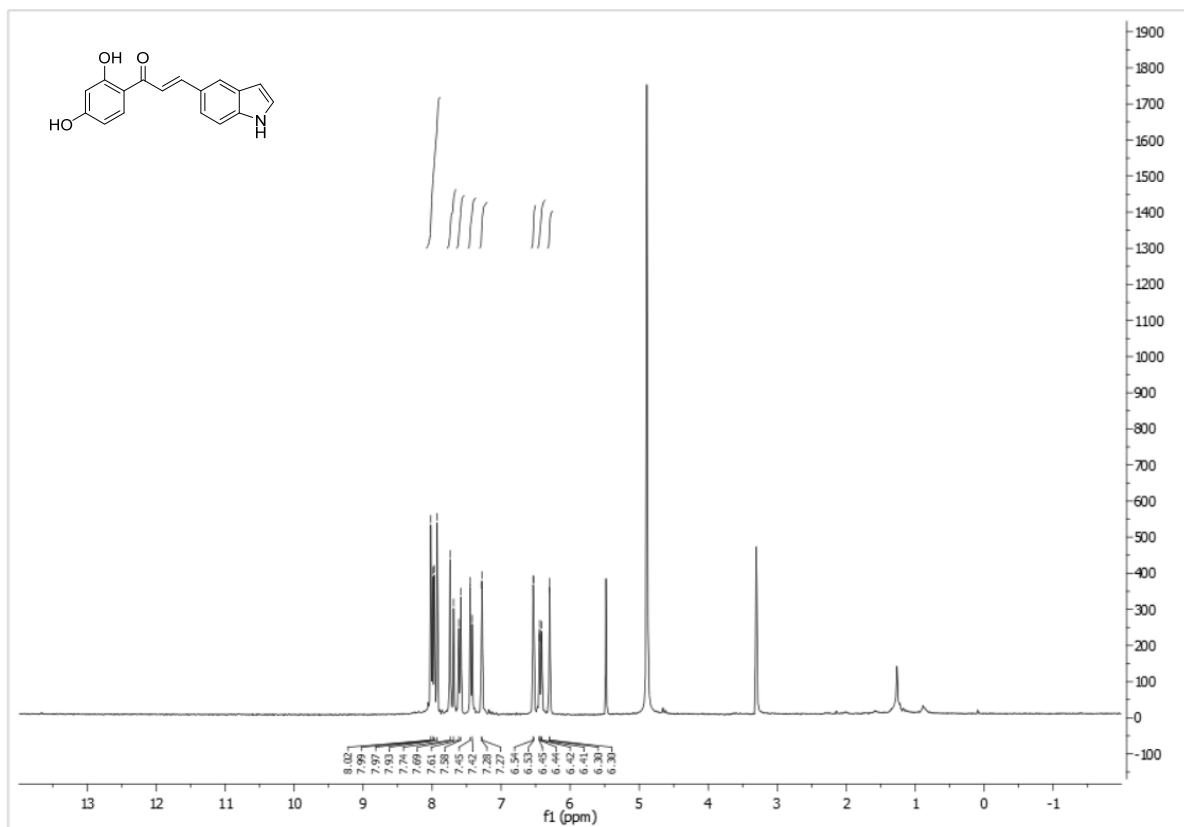

Figure S12.  $^1\text{H}$  NMR (300 MHz,  $\text{CD}_3\text{OD}$ ) spectrum of compound 25a.



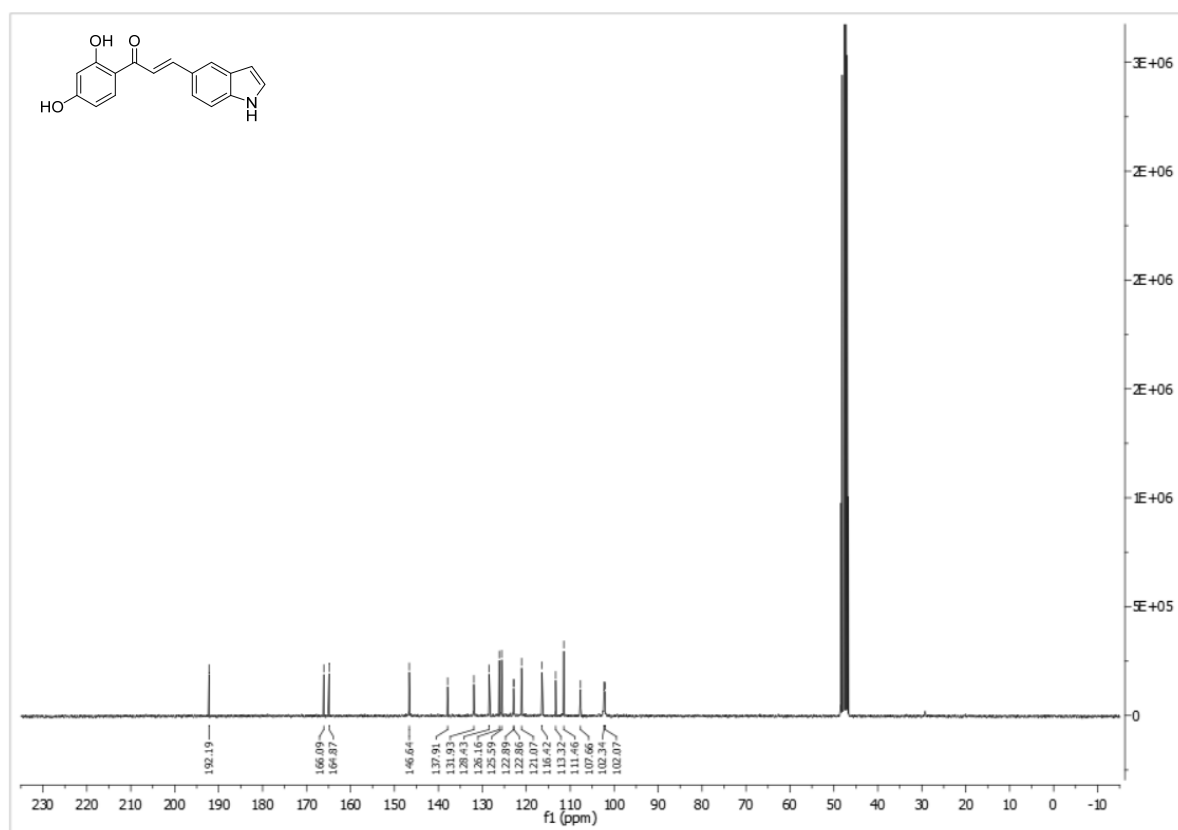

**Figure S13.** <sup>13</sup>C NMR (75 MHz, CD<sub>3</sub>OD) spectrum of compound 25a.

#### 1.2.8. Compound 25b

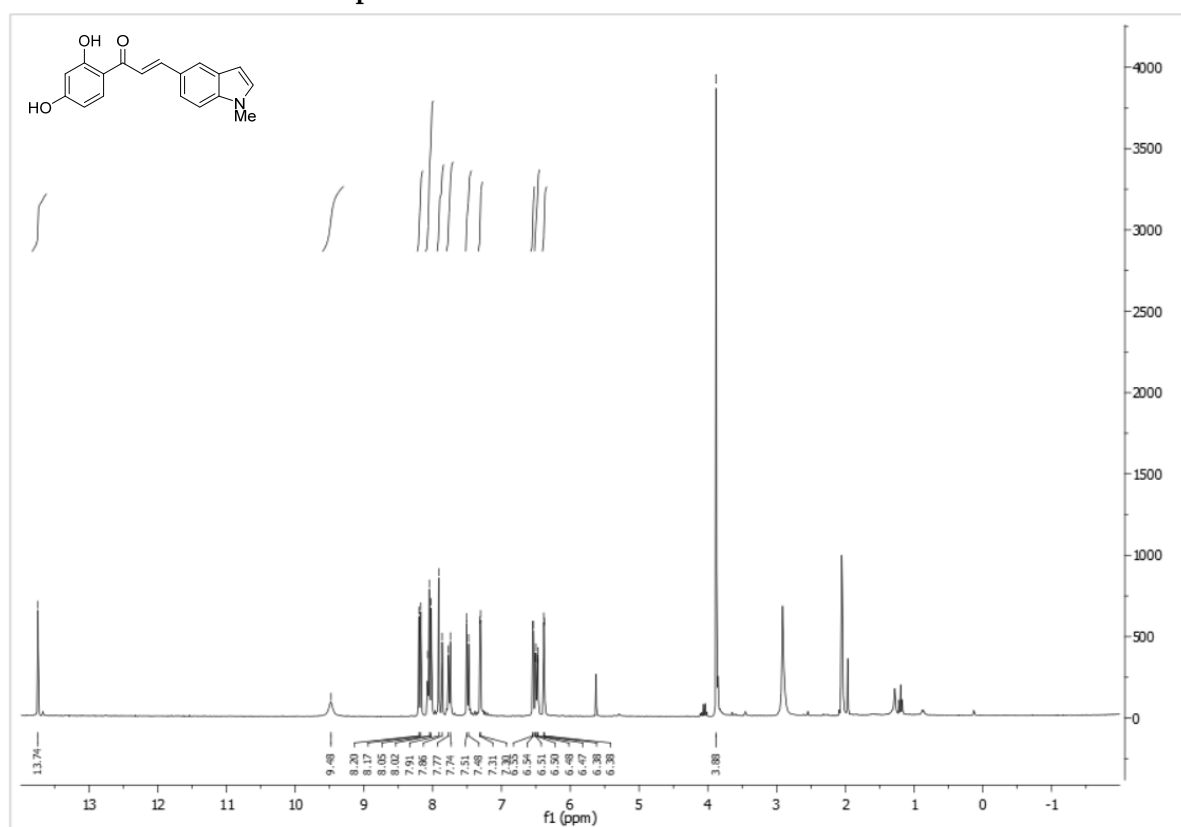

**Figure S14.** <sup>1</sup>H NMR (300 MHz, Acetone-*d*<sub>6</sub>) spectrum of compound 25b.

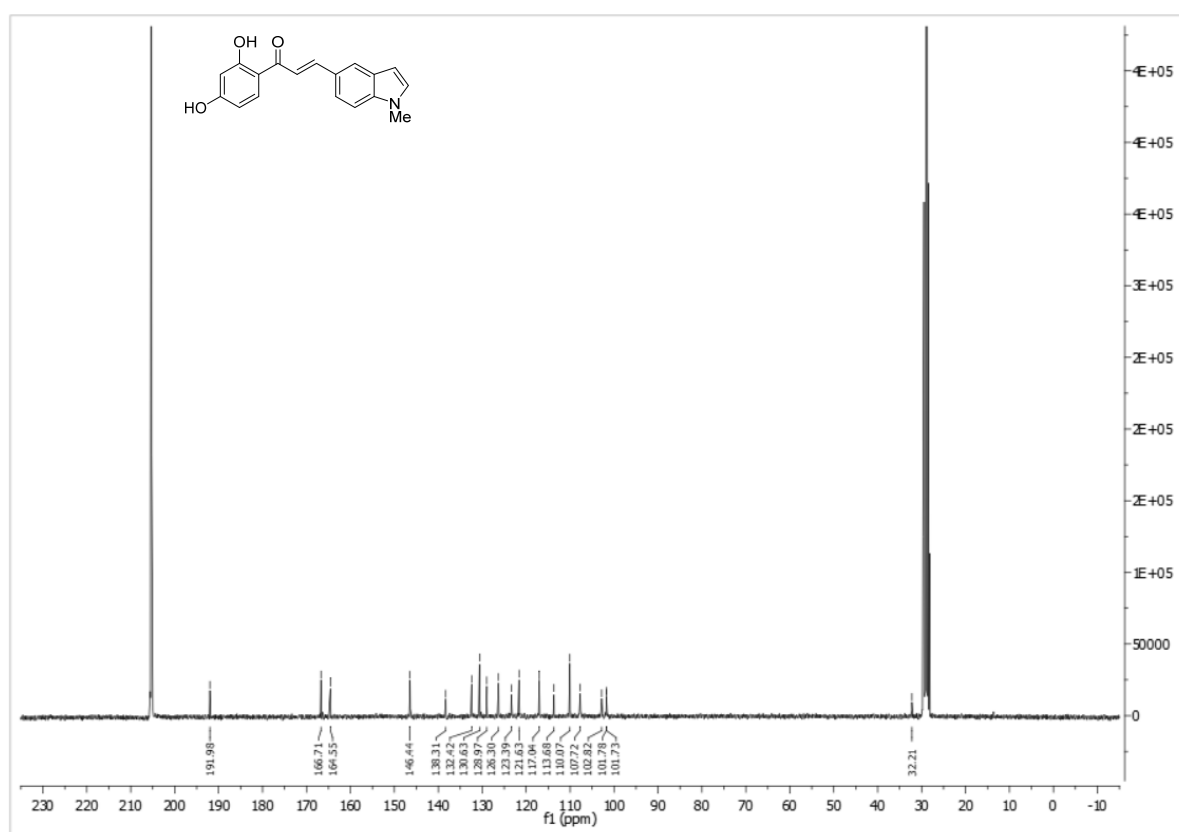

Figure S15.  $^{13}\text{C}$  NMR (75 MHz, Acetone- $d_6$ ) spectrum of compound 25b.

#### 1.2.9. Compound 28a

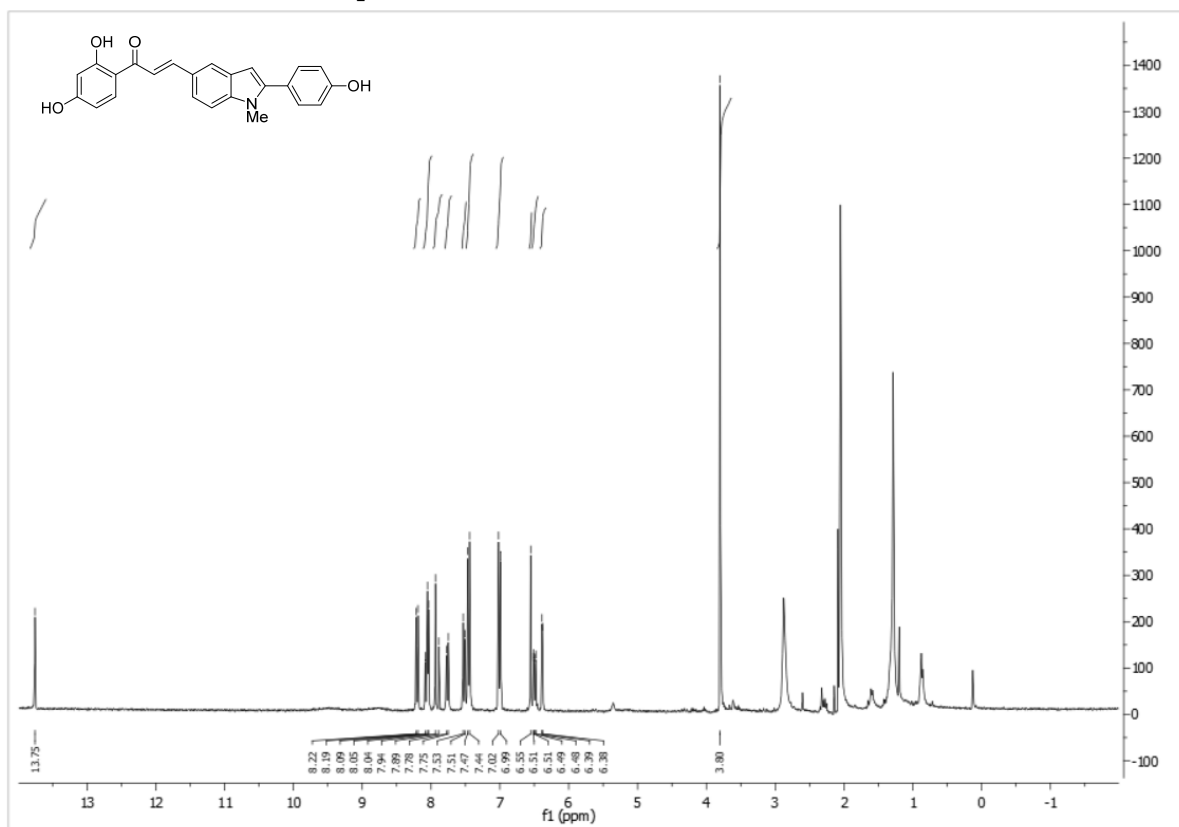

Figure S16.  $^1\text{H}$  NMR (300 MHz, Acetone- $d_6$ ) spectrum of compound 28a.

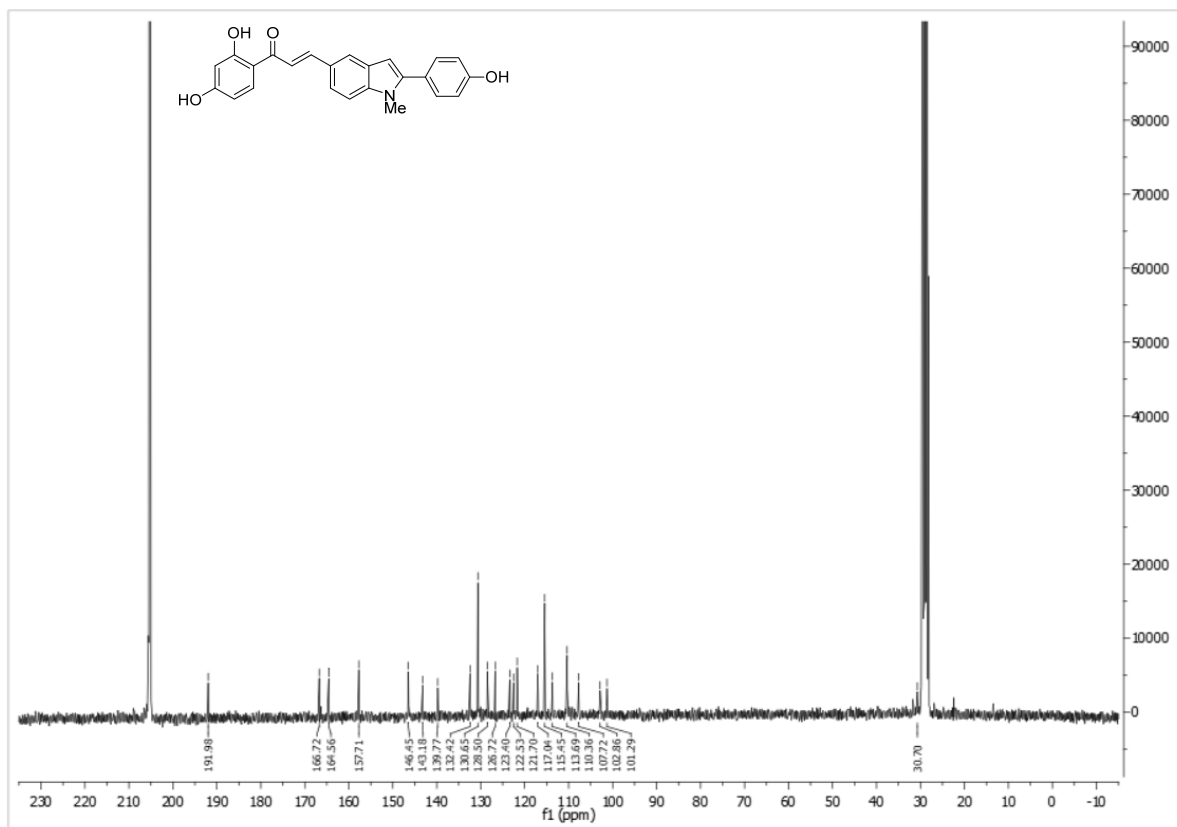

Figure S17. <sup>13</sup>C NMR (75 MHz, Acetone-*d*<sub>6</sub>) spectrum of compound 28a.

#### 1.2.10. Compound 28b

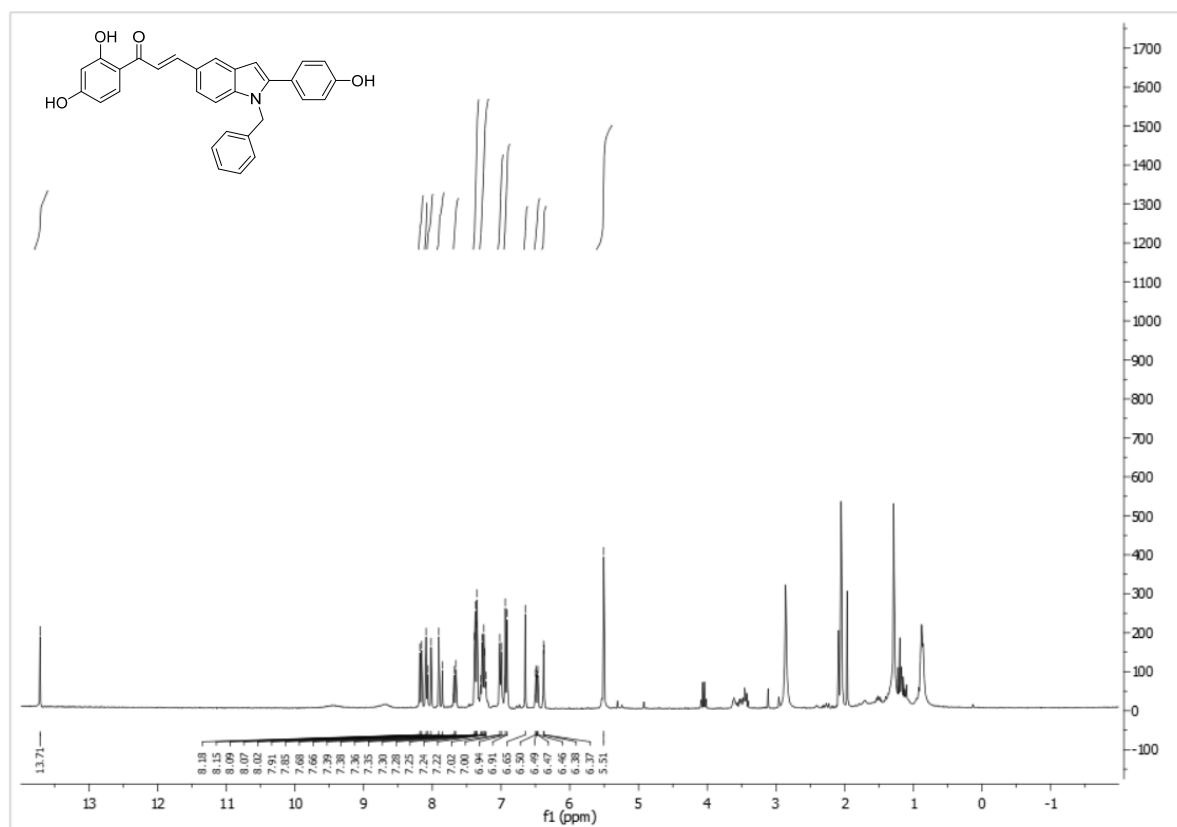

Figure S18. <sup>1</sup>H NMR (300 MHz, Acetone-*d*<sub>6</sub>) spectrum of compound 28b.

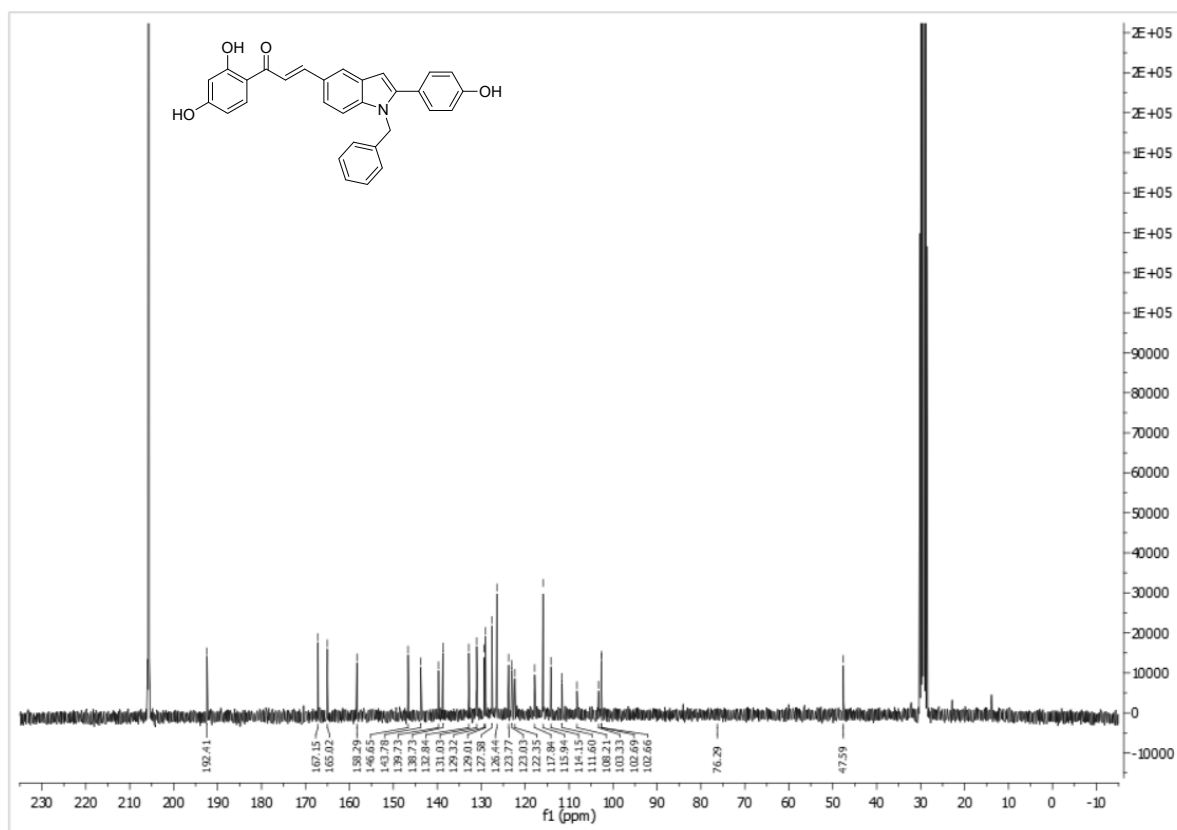

**Figure S19.**  $^{13}\text{C}$  NMR (75 MHz, Acetone- $d_6$ ) spectrum of compound **28b**.

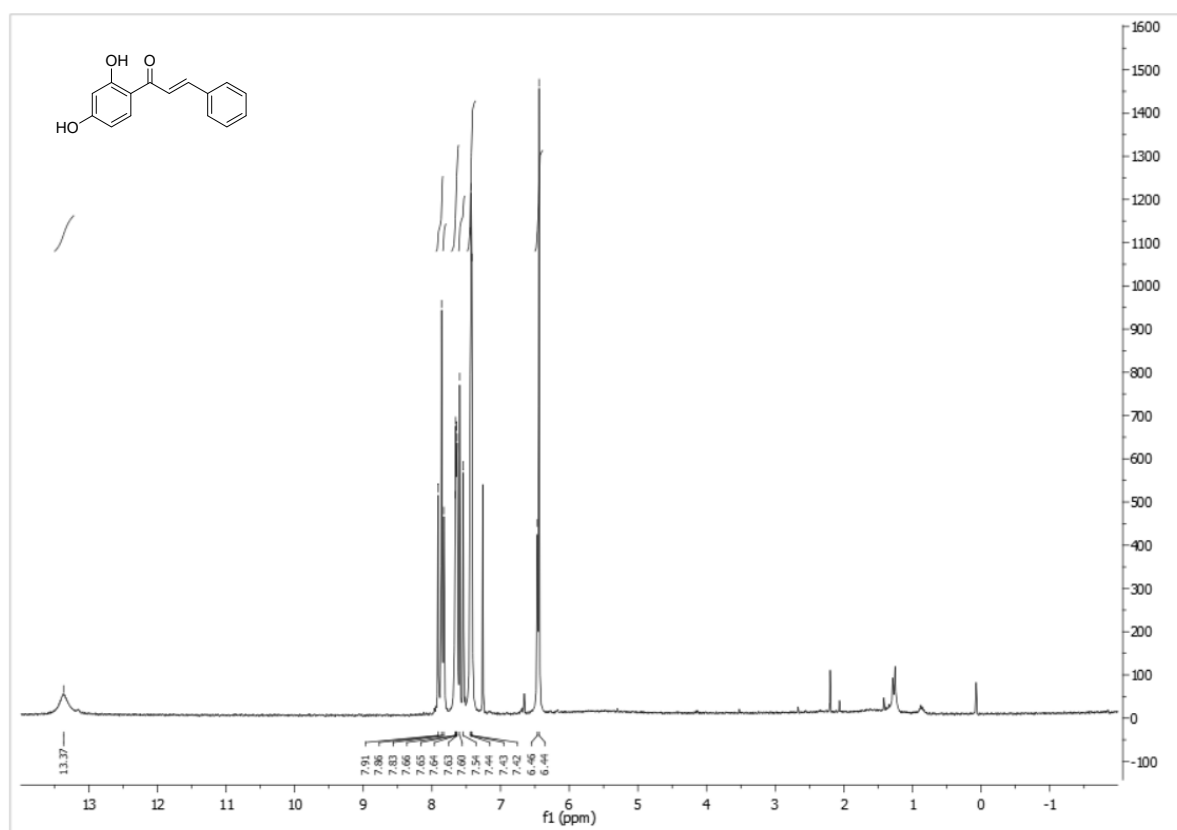

#### 1.2.11. Reference compound 29

**Figure S20.**  $^1\text{H}$  NMR (300 MHz,  $\text{CDCl}_3$ ) spectrum of reference compound **29**.

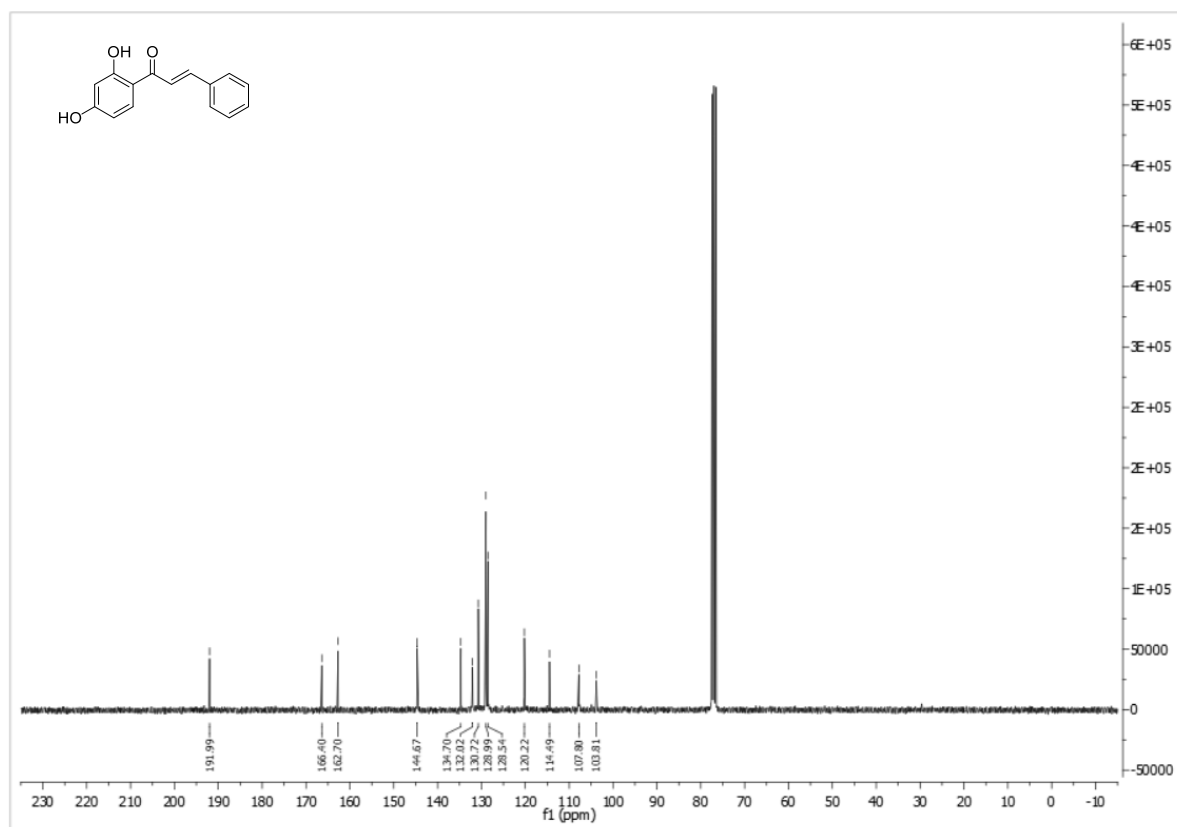

**Figure S21.** <sup>13</sup>C NMR (75 MHz, CDCl<sub>3</sub>) spectrum of reference compound 29.
